# Supplementary material
Source: PubMed Central journal article supplement (PMC2864476)
Supplement: neo1205_0388SD1.pdf [file neo1205_0388SD1.pdf]

**Table W1.** Reported Cytokine Plasma Levels in Patients with Cancer.

| Cytokine       | Reported Plasma Concentration, mean (pg/ml)                                                       | Cancer Tested                                                | References                                                                                                                                             | Notes on Correlation                                                                                                                                                                                                                                                                                   |
|----------------|---------------------------------------------------------------------------------------------------|--------------------------------------------------------------|--------------------------------------------------------------------------------------------------------------------------------------------------------|--------------------------------------------------------------------------------------------------------------------------------------------------------------------------------------------------------------------------------------------------------------------------------------------------------|
| GM-CSF         | 0.32                                                                                              | Prostate                                                     | Adler et al. [1]                                                                                                                                       | No correlation with stage                                                                                                                                                                                                                                                                              |
| HGF            | 499.00 (PT)<br>1,062.00 (Met)                                                                     | Prostate                                                     | Gupta et al. [2]                                                                                                                                       | Predictor of metastasis                                                                                                                                                                                                                                                                                |
| IL-6           | 0.36 (RL)<br>1.94 (PT)<br>93.15 (Met)                                                             | Colorectal<br>Prostate                                       | Kim et al. [3]<br>Adler et al. [1]                                                                                                                     | Increased risk when over RL<br>Increased with stage and metastasis                                                                                                                                                                                                                                     |
| MCP-1          | 365.26                                                                                            | AML                                                          | Mazur et al. [4]                                                                                                                                       | Increased over control                                                                                                                                                                                                                                                                                 |
| M-CSF          | —*<br>9700.00 (Met)<br>4200.00 (PT)<br>867.00 (Met)<br>—*<br>627.00 (Met)<br>604.00               | Breast<br><br><br>Prostate<br><br>Head and neck              | Lawicki et al. [5]<br>Scholl et al. [6]<br><br>McDermott et al. [7]<br>Ide et al. [8]<br>McDermott et al. [7]                                          | Correlated with stage<br>Increased with metastasis and stage<br>Increased with metastasis<br>Increased with bone metastasis<br>Increased over control                                                                                                                                                  |
| MMP-1          | 700.00                                                                                            | Thyroid                                                      | Komorowski et al. [9]                                                                                                                                  | No difference compared with control                                                                                                                                                                                                                                                                    |
| MMP-13         | 15,200.00 (PT)<br>28,600.00 (Met)                                                                 | Prostate                                                     | Morgia et al. [10]                                                                                                                                     | Increased with metastasis, decreased with treatment                                                                                                                                                                                                                                                    |
| MMP-2          | —*<br>839,000.00 (PT)<br>1,230,000.00 (Met)<br>568,900.00<br>605,950.00                           | Ovarian<br>Prostate<br><br>Colorectal<br>Thyroid             | Manenti et al. [11]<br>Morgia et al. [10]<br><br>Tutton et al. [12]<br>Komorowski et al. [9]                                                           | No difference compared with control<br>Increased with metastasis, decreased with treatment<br><br>Decreased with treatment<br>Increased over control                                                                                                                                                   |
| MMP-9          | 51,400.00 (RL)<br>—*<br>—*<br>48,600.00 (PT)<br>108,000.00 (Met)<br>97,300.00<br>56,500.00        | Ovarian<br>Breast and lung<br>Prostate<br><br>Colorectal     | Tamura et al. [13]<br>Manenti et al. [11]<br>Susskind et al. [14]<br>Morgia et al. [10]<br><br>Castellano et al. [15]<br>Tutton et al. [12]            | Increased with stage. Levels above RL correlate with LN metastasis<br>Increased in cancer and nonmalignant patients<br>Increased in patients, decreased with RT<br>Increased with metastasis, decreased with treatment<br>Increased with stage, decreased with treatment<br>Decreased with treatment   |
| OPG            | 1717.00<br>—*                                                                                     | Neoblastoma<br>Prostate, Lung and Breast                     | Granchi et al. [16]<br>Mountzios et al. [17]                                                                                                           | Decreased over control<br>Increased with metastasis                                                                                                                                                                                                                                                    |
| OPN            | 170,600.00                                                                                        | Prostate                                                     | Castellano et al. [15]                                                                                                                                 | Increased with stage, decreased with treatment                                                                                                                                                                                                                                                         |
| RANKL          | 41.40                                                                                             | Neuroblastoma                                                | Granchi et al. [16]                                                                                                                                    | Increased with stage, metastasis, and unfavorable pathohistology                                                                                                                                                                                                                                       |
| SDF-1 $\alpha$ | 2448.00<br>2661.00 (RL)<br><br>2717.00 (PT)<br>3114.00 (Met)                                      | Breast<br><br>Multiple<br>Myeloma                            | Potter et al. [18]<br>Hassan et al. [19]<br><br>Zannettino et al. [20]                                                                                 | Increased metastasis below RL<br>Increased with metastasis                                                                                                                                                                                                                                             |
| TGF- $\beta_1$ | 4320.00<br>—*<br>3280.00 (RL)<br>15,500.00 (Met)<br>5200.00 (PT)<br>15,250.00 (Met)<br>2630.00    | Breast<br><br>Prostate<br><br>Breast and prostate            | Ivanovic et al. [21]<br>Decensi et al. [22]<br>Nikolic-Vukosavljevic et al. [23]<br>Shariat et al. [24]<br><br>Adler et al. [1]<br>Baselga et al. [25] | Increased with stage and associated with metastasis<br>Inverse correlation with disease recurrence<br>Levels above RL correlate with decreased survival<br>Increased with metastasis to LN and bone<br>Increased with metastasis<br>Increased in patients, 1.4-fold higher than breast cancer patients |
| TIMP-1         | 240,000.00<br>292,000.00<br>108,700.00<br>133,000.00<br>—*<br>378,000.00 (PT)<br>541,000.00 (Met) | Colorectal<br>Breast<br><br>Ovarian<br>Breast<br>Lung        | Holten-Andersen et al. [26]<br>Holten-Andersen et al. [26]<br>Schrohl et al. [27]<br>Manenti et al. [11]<br>Susskind et al. [14]                       | Advanced breast cancer<br><br>Increased over nonmalignant<br>Increased in patients and remain high after RT<br>Lower than controls, Increased with treatment                                                                                                                                           |
| TIMP-2         | 29,800.00<br>114,200.00                                                                           | Ovarian<br>Thyroid                                           | Manenti et al. [11]<br>Komorowski et al. [9]                                                                                                           | Increased over nonmalignant<br>Increased over control                                                                                                                                                                                                                                                  |
| TNF $\alpha$   | 2.24 (RL)<br>3.95 (PT)<br>4.34 (Met)                                                              | Colorectal<br>Prostate                                       | Kim et al. [3]<br>Adler et al. [1]                                                                                                                     | Increased risk when over RL<br>Increased with stage and metastasis                                                                                                                                                                                                                                     |
| TPO            | 232.00<br>—*                                                                                      | CLL<br>Lung                                                  | Koller et al. [28]<br>Werynska et al. [29]                                                                                                             | Increased over controls, Increased with stage<br>Increased in patients with reactive thrombocytosis                                                                                                                                                                                                    |
| uPAR           | —*<br>1600.00 (PT)<br>2400.00 (Met)                                                               | Ovarian<br>Prostate                                          | Henic et al. [30]<br>Shariat et al. [31]                                                                                                               | Increased with stage, indicates poor prognosis<br>Increased in metastasis, decreased with treatment                                                                                                                                                                                                    |
| VEGF           | 316.80 (RL)<br>—*<br>109.10<br>31.30 (Met)<br>9.91 (PT)<br>32.60<br>74.30                         | NSCLC<br>Various<br>Ovarian<br>Prostate<br>Breast<br>Thyroid | Tamura et al. [13]<br>Wynendaele et al. [32]<br>Manenti et al. [11]<br>Shariat et al. [33]<br>Burstein et al. [34]<br>Komorowski et al. [9]            | Increased with stage. Levels above RL correlate with LN metastasis<br>Increased over controls<br>Significantly higher than nonmalignant patients<br>Increased with stage and metastasis<br>Associated with decreased time to recurrence<br>No difference compared with control                         |

AML indicates acute myeloid leukemia; CLL, chronic lymphocytic leukemia; LN, lymph node; Met, metastasis; NSCLC, non-small cell lung carcinoma; PT, primary tumor; RL, reference level; RT, radiotherapy.  
\*No exact values reported.
